# Supplementary material for: Cormorant predation mortality of perch (Perca fluviatilis) in coastal and archipelago areas, northern Baltic Sea
Source: Oxford University Press journal article supplement (doi:10.1093/icesjms/fsab258), 2021-12-13
Supplement: fsab258_supplemental_files.zip [file fsab258_supplemental_files.zip]

Archive with 4 entries (4 files):
- HALIAS_data_graphs_Supplement_2.pdf
- Supplement_3_rectangle_55H1_09122021.docx
- Supplement_4_RISK_output.pdf
- Supplement_material_1_Data.xlsx
