# Supplementary material for: Cormorant predation mortality of perch (Perca fluviatilis) in coastal and archipelago areas, northern Baltic Sea
Source: Oxford University Press journal article supplement (doi:10.1093/icesjms/fsab258), 2021-12-13

## Average numbers of migrating cormorants

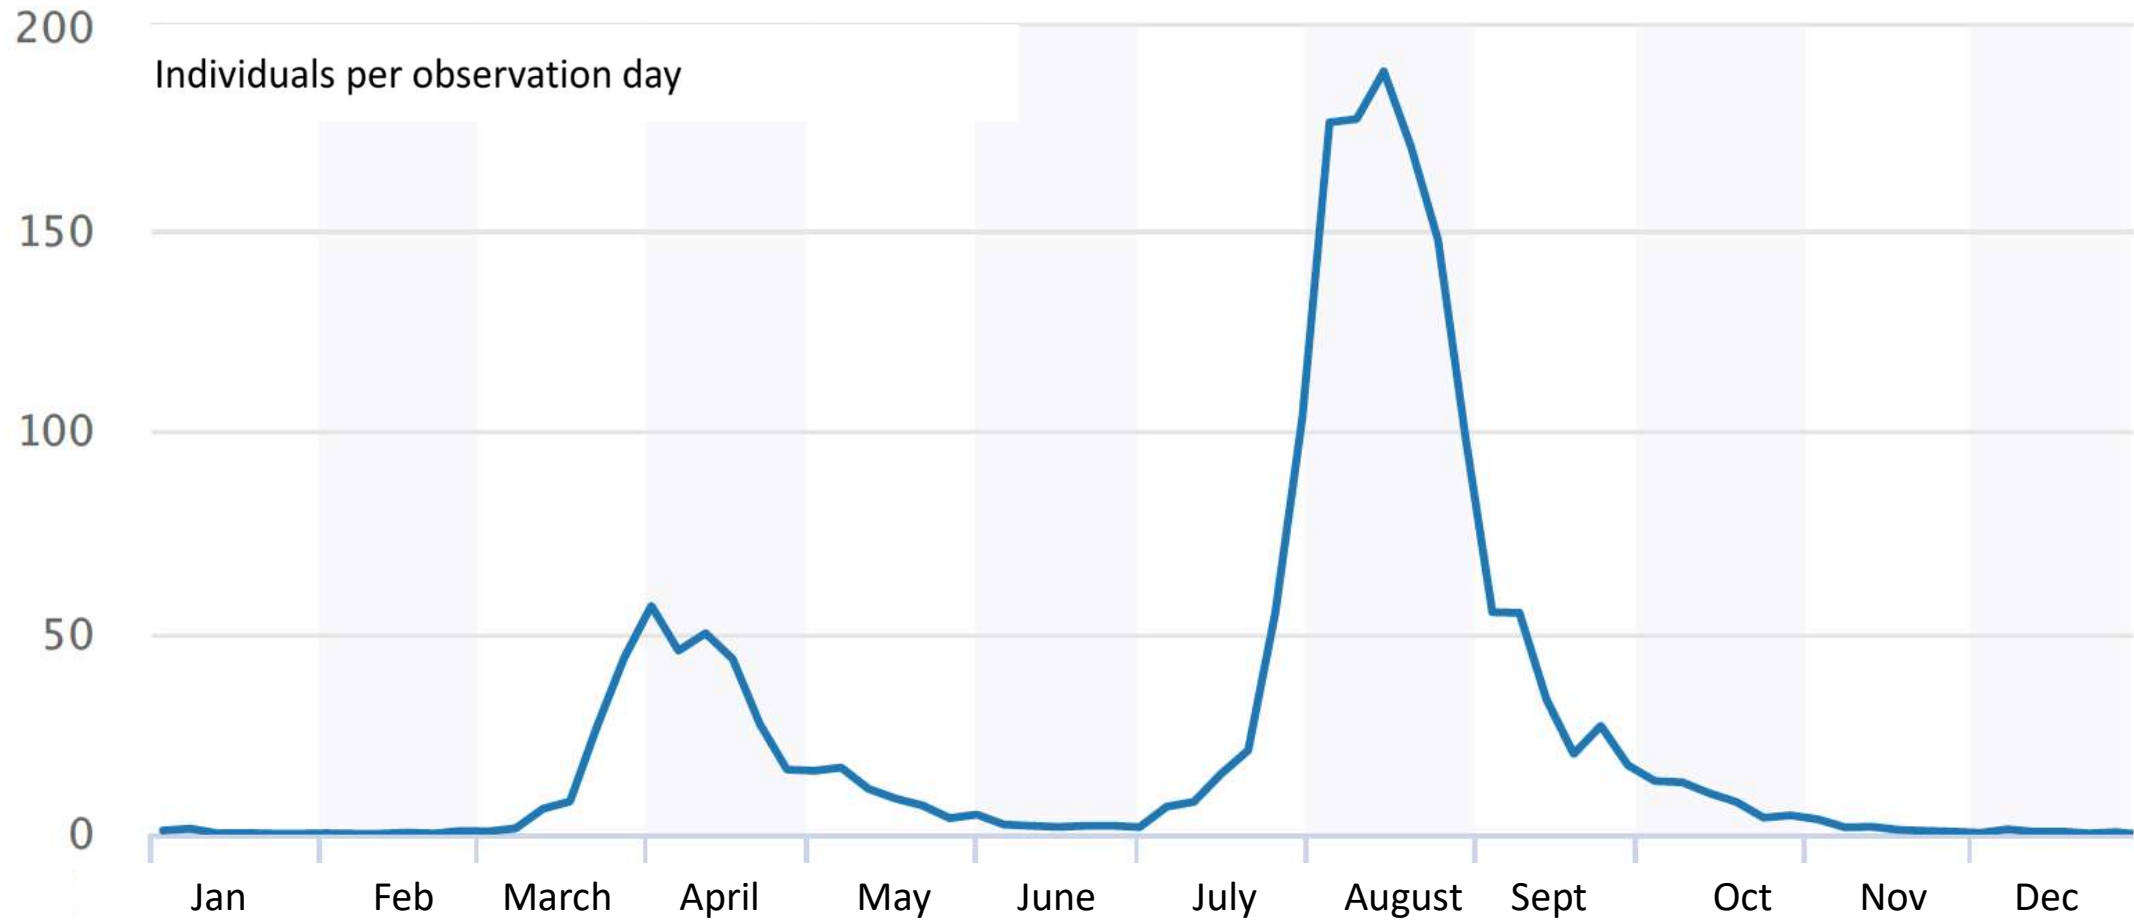

## Median dates of spring and autumn migrations of cormorants

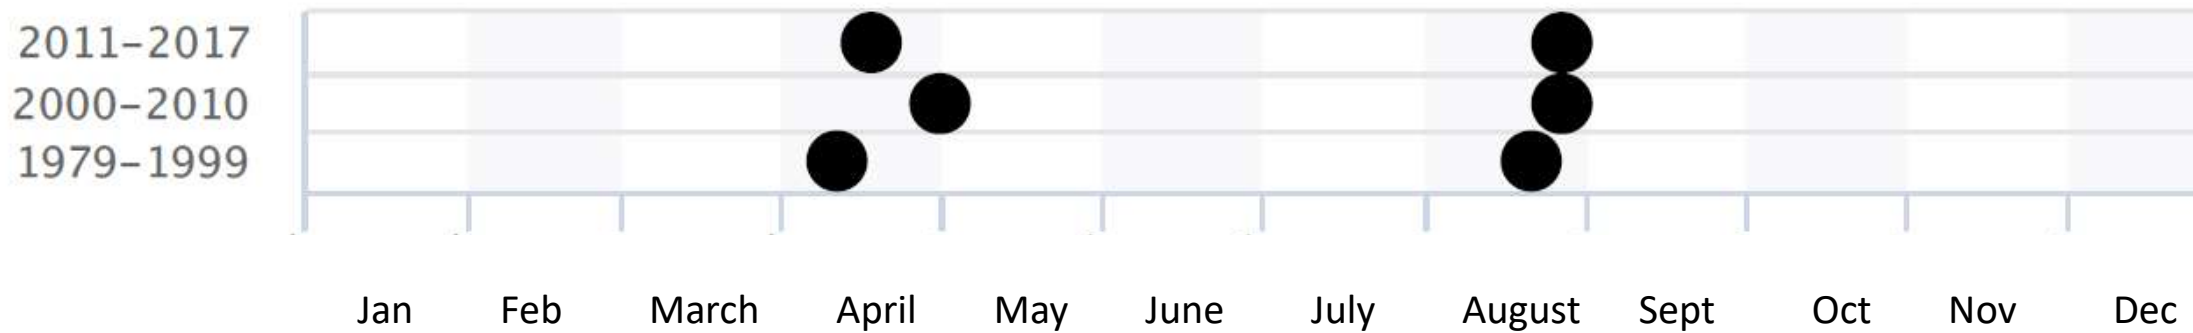

Supplement: fsab258_supplemental_files.zip [file fsab258_supplemental_files.zip › HALIAS_data_graphs_Supplement_2.pdf]
