# Supplementary material for: Cormorant predation mortality of perch (Perca fluviatilis) in coastal and archipelago areas, northern Baltic Sea
Source: Oxford University Press journal article supplement (doi:10.1093/icesjms/fsab258), 2021-12-13
Supplement: fsab258_supplemental_files.zip [file fsab258_supplemental_files.zip › Supplement_3_rectangle_55H1_09122021.docx]

Cormorant predation mortality of perch *(Perca fluviatilis*) in coastal and archipelago areas, northern Baltic Sea

**Supplementary material: Rectangle 55H1, Quark**

*Material and Methods: Consumption of perch by cormorants in rectangle 55H1 in 2018*

The estimation of cormorant perch consumption was separately done for rectangle 55H1 to allow comparison to the PIT-tagging results from 2018 (Veneranta *et al*., 2020a). To compare our estimates to the tagging results, the annual proportional mortality caused by cormorants in the rectangle 55H1 should be considered.

The total annual food consumption of the cormorant population (3140 breeding pairs) in the study area (55H1) was estimated using the same daily consumption rates as in Table 3 in the main document, but the migration dates were assumed to differ from the more southern areas. According to Veneranta et al. (2020), the tagging results by Byholm et al. (unpublished data), and observations in the monitoring of cormorants in Finland (P. Rusanen, Finnish Environment Institute (SYKE)) the birds were estimated to arrive to the area after mid-April and leave the breeding area starting in the latter half of July and ending mainly by mid-September (Table S3 below).

According to cormorant diet studies the proportion of perch varies in different coastal areas and depends on the abundance of perch, location of the colony and time of year. The average annual proportion of perch in food biomass has been 25%‒35% in the Archipelago Sea in the years 2010‒2012 (Salmi *et al*. 2013, 2015), and 10%‒19% in the Bothnian Sea (outer archipelago) (Salmi *et al*. 2013). In the Quark the proportion of perch was below 20% in 2008 (Salmi 2011). Optional values 20%‒40 % were used to calculate the biomass of perch consumed, and accordingly, about half of the biomass was assumed to belong to the subpopulation that will grow to the size targeted by fishing (see the main document).

The average size in numbers of the perch subpopulation targeted by fishing was estimated using the annual fisheries catch data in 2010–2017 (Official Statistics Finland, OSF), to represent the assumed equilibrium state and the abundance of perch in the age groups consumed by cormorants in 2018. Average commercial perch catch in the 55H1 was 135 tonnes per year in 2010—2017. According to Veneranta et al. (2020b), numbers of tag returns from individually tagged perch did not differ between commercial and recreational fishers in rectangle 55H1. Accordingly, if equal tag return rates are assumed, the recreational catch would equal to the commercial catch. On the other hand, according to fisheries catch data from the coast of Bothnia (OSF) in 2018, the proportion of commercial catch was 36% of the total catch, thus the recreational catch could be estimated at 1.78 times the commercial catch in rectangle 55H1.

Optional values of fishing mortality (*F*) 0.5—1.0 were used, and the range 0.12—0.24 was used for natural mortality (*M*) in the age groups recruited to fishing (Tables S1, S2), according to Veneranta et al. (2020a). The age groups ≥6 were assumed to be recruited to fishing, and ages 2—5 are vulnerable to cormorant predation (Veneranta et al. 2020a).

The mean weights of perch in the commercial catch samples (Table S4) were used to estimate the numbers of perch in the catch, and the size of the perch subpopulation targeted by fisheries was calculated using Baranov’s equation similarly to other areas (see the main document).

The fish consumption estimates of cormorants were like those in other areas (see the main document), only the migration dates of cormorants differed (Table S3). The resulting value for *FC*, fish consumption per cormorant nest in tonnes, was 0.19 (triangle distribution, range 0.13—0.26).

The relationship ages 2—5 in numbers versus ages ≥6 (coefficient *K*) was estimated using the same natural mortality values as in Veneranta et al. (2020a) (Table S1), and a triangle distribution was fitted for *K* using the estimated probabilities of different mortality options (Table S2). The analysis with parameter values given in Table S4, for estimating the proportion of perch consumed by the cormorant population, was run using @*RISK*-software (Palisade).

*Table S1. Optional values of instantaneous natural mortality (M) of perch by age in rectangle 55H1.*

| Age | Low M | Medium M | HIgh M |
| --- | --- | --- | --- |
| 2 | 0.22 | 0.55 | 0.88 |
| 3 | 0.22 | 0.55 | 0.88 |
| 4 | 0.22 | 0.55 | 0.88 |
| ≥5 | 0.12 | 0.18 | 0.24 |

*Table S2. Assumed probabilities of optional F and M values and resulting probability distribution of the coefficient K in rectangle 55H1. M options for different age groups can be seen in Table S1 and the simplified probability distribution used for K in simulation in Table S4.*

| *F* optional value | *F* probability | *M*  option | *M* probability | Probability distribution | Value of *K* |
| --- | --- | --- | --- | --- | --- |
|  |  | low | 0.1 | 0.03 | 4.0 |
| 0.5 | 0.3 | medium | 0.7 | 0.21 | 8.9 |
|  |  | high | 0.2 | 0.06 | 22.0 |
|  |  |  |  |  |  |
|  |  | low | 0.1 | 0.05 | 4.8 |
| 0.7 | 0.5 | medium | 0.7 | 0.35 | 10.5 |
|  |  | high | 0.2 | 0.1 | 25.4 |
|  |  |  |  |  |  |
|  |  | low | 0.1 | 0.02 | 5.8 |
| 1.0 | 0.2 | medium | 0.7 | 0.14 | 12.5 |
|  |  | high | 0.2 | 0.04 | 29.6 |

*Table S3. Input-variable likelihood distribution estimates used in the estimation of the food consumption of the nominal cormorant population of 1000 nests (2000 birds) in rectangle 55H1.*

| **Parameter name, abbreviation** | **Expected value** | **Likelihood distribution** | **Notes** |
| --- | --- | --- | --- |
| **Breeding sub-population, breeding period** | | | |
| April–May–June, bird count | 2000 |  |  |
| Fish consumption kg bird-1 day-1 | 0.436 | Triangle (0.392; 0.436; 0.48) | Ridgway (2010); ± 10% |
| Number of days | 73 | Triangle (61; 68; 76) | Birds present 0, 7 or 15 days in April |
| July adults, bird count | 2000 |  |  |
| Fish consumption, kg adult-1 day-1 | 0.542 | Triangle (0.488; 0.542; 0.596) | Ridgway (2010); ± 10% |
| July chicks, bird count | 2000 | Uniform (1500 –2000) | 2 per nest, or less if nests destroyed |
| Fish consumption, kg chick-1 day-1 | 0.327 | Triangle (0.294; 0.327; 0.36) | Ridgway (2010); ± 10% |
| Number of days in July | 31 |  |  |
| **Young or non-breeding sub-population, April—July** | | | |
| Bird count in April | 667 |  | 25% of the whole population |
| Fish consumption kg bird-1 day-1 | 0.436 | Triangle (0.392; 0.436; 0.48) | Ridgway (2010); ± 10% |
| Number of days in April | 12 | Triangle (0; 7; 15) |  |
| Bird count in May - July | 1000 | Histogram (1000;1334; probabilities 0.7/0.3) | 33% or 40% of the whole population |
| Fish consumption kg bird-1 day-1 | 0.436 | Triangle (0.392; 0.436; 0.48) | Ridgway (2010); ± 10% |
| Number of days in May**—**July | 92 |  |  |
| **Whole population after breeding time (August—September)** | | | |
| Bird count as a result from previous calculation | 5000 | 4500–5334 | Breeding population +chicks+non-breeding population |
| Fish consumption kg bird-1 day-1 | 0.436 | Triangle (0.392; 0.436; 0.48) | Ridgway (2010); ± 10% |
| Number of days | 15 | Triangle (-16; 15; 46) | Autumn migration 15 July—15 September, median 15 August |

*Table S4. The input parameters used in the estimation of the perch population size and the consumption of cormorants in rectangle 55H1.*

| **Parameter name, abbreviation** | **Expected value** | **Likelihood distribution** | **Notes** |
| --- | --- | --- | --- |
| Commercial catch (kg year -1) | 135 000 | Uniform (103 000—164 000 | OSF 2010—2017 |
| Coefficient recreational catch/ commercial catch | 1.39 | Uniform (1—1.78) | Veneranta et al. (2020b) |
| *F*, fishing mortality of perch (year -1) | 0.7 | Histogram (0.5; 1.0; {0.3/ 0.5/ 0.2}) | Own estimate, recruited stock (Veneranta et al. 2020a) |
| *M*, natural mortality of perch (year -1) | 0.18 | Histogram (0,12; 0,24; {0,1\0,7\0,2}) | Own estimate, recruited stock (Veneranta et al. 2020a) |
| Mean weight of perch in the catch (kg) | 0.236 | Uniform (0.228—0.262) | Samples from commercial catch 2017 |
| Coefficient *K* | 12.8 | Triangle (3; 10; 30) | ∑Ny/∑Nf, see main document for explanation |
| Number of cormorant nests |  | 3140 | Nest count 2018 |
| FC, Fish consumption per cormorant nest | 0.19 | Triangle (0.13; 0.19; 0.26) | Total consumption (tonnes)/ nest count (based on Table S3) |
| Proportion of perch in the diet % | 30 | Uniform (20; 30; 40) | Salmi et al. (2013; 2015) |
| Share of the perch sub-population targeted by fisheries in the diet % | 50 | Triangle (40; 50; 60) | Perch catch samples, Archipelago Sea and Quark |
| Mean weight of perch in the diet (kg) | 0.047 | Uniform (0.042; 0.047; 0.052) | Salmi et al. (2015), Archipelago Sea |

**References**

Lehikoinen, A. 2003. Merimetson kannankehitys Suomessa – pesintämenestys, ravinto ja vaikutus muuhun pesimälinnustoon. MSc thesis, University of Helsinki. [In Finnish].

Salmi, J. 2011. Merimetson (Phalacrocorax carbo (L.)) ravinto Suomen rannikkovesissä. Master’s thesis. University of Jyväskylä. http://urn.fi/URN:NBN:fi:jyu-2011121311792 (In Finnish).

Salmi, J. A., Auvinen, H., Raitaniemi, J., Kurkilahti, M., Lilja, J., & Maikola, R. 2013. Merimetson ravinto ja kalakantavaikutukset Saaristo- ja Selkämerellä. RKTL:n työraportteja 19/2013. 36 p. (in Finnish).

Salmi, J. A., Auvinen, H., Raitaniemi, J., Kurkilahti, M., Lilja, J., & Maikola, R. 2015. Perch (Perca fluviatilis) and pikeperch (Sander lucioperca) in the diet of the great cormorant (Phalacrocorax carbo) and effects on catches in the Archipelago Sea, Southwest coast of Finland. Fisheries Research, 164: 26 –34.

Ridgway, M.S. 2010. A review of estimates of daily energy expenditure and food intake in Cormorants (Phalacrocorax spp.). Journal of Great Lakes Research 36: 93–99.

Veneranta, L., Heikinheimo. O., & Marjomäki, T.J. 2020a. Cormorant (Phalacrocorax carbo) predation on a coastal perch (Perca fluviatilis) population: estimated effects based on PIT tag mark-recapture experiment. ICES Journal of Marine Science 77 (7-8): 2611–2622. https://doi.org/10.1093/icesjms/fsaa124

Veneranta, L., Olin, M. & Harjunpää, H. 2020b. Ahventen pyynti- ja syönnösalueet Merenkurkussa T-ankkurimerkinnän perusteella. [Perch fishing and feeding areas in the Quark based on T-anchor tagging]. Luonnonvara- ja biotalouden tutkimus 7/2020. Luonnonvarakeskus (Natural Resources Institute Finland). Helsinki. 20 p. (In Finnish).
