# Supplementary material for: Cormorant predation mortality of perch (Perca fluviatilis) in coastal and archipelago areas, northern Baltic Sea
Source: Oxford University Press journal article supplement (doi:10.1093/icesjms/fsab258), 2021-12-13
Supplement: fsab258_supplemental_files.zip [file fsab258_supplemental_files.zip › Supplement_4_RISK_output.pdf]

## Archipelago Sea

| Name              | Perch population size, age groups 2–5*), fishing-targeted subpopulation (from VPA assessment) | Food consumption of cormorants (tonnes), whole season | Consumption of perch (tonnes) by cormorants | Consumption of perch (tonnes), fishing-targeted subpopulation | Consumption of fishing-targeted perch subpopulation in numbers | Proportion (%) consumed by cormorants of perch age groups 2–5, fishing-targeted subpopulation |
|-------------------|-----------------------------------------------------------------------------------------------|-------------------------------------------------------|---------------------------------------------|---------------------------------------------------------------|----------------------------------------------------------------|-----------------------------------------------------------------------------------------------|
| Description       | RiskTriang(A19; B19; C19)                                                                     | Output                                                | Output                                      | Output                                                        | Output                                                         | Output                                                                                        |
| Cell              | E19                                                                                           | E22                                                   | E25                                         | E27                                                           | E29                                                            | E30                                                                                           |
| Minimum           | 25417670                                                                                      | 722.2994                                              | 149.7858                                    | 69.44885                                                      | 1438053                                                        | 1.044369                                                                                      |
| Maximum           | 178882600                                                                                     | 1782.724                                              | 683.7158                                    | 368.7581                                                      | 8563674                                                        | 22.7317                                                                                       |
| Mean              | 90666680                                                                                      | 1212.838                                              | 363.9337                                    | 181.9658                                                      | 3886045                                                        | 4.935374                                                                                      |
| Std Deviation     | 32728710                                                                                      | 196.4363                                              | 92.50772                                    | 48.6732                                                       | 1067603                                                        | 2.467651                                                                                      |
| Variance          | 1.07117E+15                                                                                   | 38587.22                                              | 8557.679                                    | 2369.081                                                      | 1.13978E+12                                                    | 6.089303                                                                                      |
| Skewness          | 0.3961454                                                                                     | 0.1156748                                             | 0.3871639                                   | 0.4589499                                                     | 0.5046733                                                      | 1.511032                                                                                      |
| Kurtosis          | 2.400323                                                                                      | 2.500808                                              | 2.676487                                    | 2.865364                                                      | 2.978746                                                       | 6.362284                                                                                      |
| Errors Calculated | 0                                                                                             | 0                                                     | 0                                           | 0                                                             | 0                                                              | 0                                                                                             |
| Mode              | 67313380                                                                                      | 965.4119                                              | 334.7878                                    | 178.6131                                                      | 2375046                                                        | 2.968266                                                                                      |
| 5% Perc           | 43036690                                                                                      | 893.7319                                              | 225.4526                                    | 110.3191                                                      | 2337245                                                        | 2.096033                                                                                      |
| 10% Perc          | 50512090                                                                                      | 955.5201                                              | 248.9952                                    | 122.2998                                                      | 2573476                                                        | 2.44276                                                                                       |
| 15% Perc          | 56240500                                                                                      | 998.9717                                              | 265.4792                                    | 130.752                                                       | 2761622                                                        | 2.697441                                                                                      |
| 20% Perc          | 61081790                                                                                      | 1037.138                                              | 280.7848                                    | 138.411                                                       | 2932149                                                        | 2.945801                                                                                      |
| 25% Perc          | 65341720                                                                                      | 1071.581                                              | 294.0036                                    | 144.9924                                                      | 3087396                                                        | 3.178474                                                                                      |
| 30% Perc          | 69267850                                                                                      | 1100.212                                              | 306.2111                                    | 151.752                                                       | 3229423                                                        | 3.398989                                                                                      |
| 35% Perc          | 73296500                                                                                      | 1128.669                                              | 318.5594                                    | 158.3709                                                      | 3371521                                                        | 3.625779                                                                                      |
| 40% Perc          | 77479750                                                                                      | 1155.4                                                | 330.5301                                    | 164.7351                                                      | 3512589                                                        | 3.861808                                                                                      |
| 45% Perc          | 81847970                                                                                      | 1181.619                                              | 342.9279                                    | 171.3389                                                      | 3645616                                                        | 4.096079                                                                                      |
| 50% Perc          | 86417120                                                                                      | 1206.358                                              | 355.1321                                    | 177.0488                                                      | 3776646                                                        | 4.365524                                                                                      |
| 55% Perc          | 91214170                                                                                      | 1233.3                                                | 368.2269                                    | 183.9136                                                      | 3916588                                                        | 4.64559                                                                                       |
| 60% Perc          | 96295900                                                                                      | 1259.09                                               | 381.9548                                    | 190.7737                                                      | 4060190                                                        | 4.920295                                                                                      |
| 65% Perc          | 101693900                                                                                     | 1288.588                                              | 396.0386                                    | 198.1283                                                      | 4220377                                                        | 5.255217                                                                                      |
| 70% Perc          | 107506400                                                                                     | 1317.299                                              | 411.629                                     | 205.765                                                       | 4397364                                                        | 5.618308                                                                                      |
| 75% Perc          | 113827600                                                                                     | 1350.523                                              | 427.4331                                    | 214.1452                                                      | 4574830                                                        | 6.052449                                                                                      |
| 80% Perc          | 120800300                                                                                     | 1388.121                                              | 444.6383                                    | 223.2834                                                      | 4777601                                                        | 6.617356                                                                                      |
| 85% Perc          | 128741600                                                                                     | 1429.545                                              | 465.0101                                    | 234.3679                                                      | 5034792                                                        | 7.297601                                                                                      |
| 90% Perc          | 138140100                                                                                     | 1481.119                                              | 490.7812                                    | 248.5416                                                      | 5343784                                                        | 8.151472                                                                                      |
| 95% Perc          | 150392700                                                                                     | 1544.953                                              | 530.1867                                    | 269.7682                                                      | 5825390                                                        | 9.74189                                                                                       |

\*) 50% of age group 5

## Bothnian Sea and Quark

| Name              | Perch catch (kg) | Perch catch in numbers | Perch stock in numbers, recruited to fishery | Perch age groups 2–5*) in numbers, fishing-targeted subpopulation | Food consumption of cormorants (tonnes), whole season | Consumption of perch (tonnes) by cormorants | Consumption of perch (tonnes), fishing-targeted subpopulation | Consumption of fishing-targeted perch subpopulation in numbers | Proportion consumed by cormorants of perch age groups 2–5, fishing-targeted subpopulation |       |
|-------------------|------------------|------------------------|----------------------------------------------|-------------------------------------------------------------------|-------------------------------------------------------|---------------------------------------------|---------------------------------------------------------------|----------------------------------------------------------------|-------------------------------------------------------------------------------------------|-------|
| Cell              | H5               | H9                     | H10                                          | H14                                                               | H17                                                   | H20                                         | H23                                                           | H26                                                            | H28                                                                                       |       |
| Minimum           |                  | 573235.5               | 2314408                                      | 6121640                                                           | 2.53E+07                                              | 1439.67                                     | 314.2388                                                      | 134.0973                                                       | 2803065                                                                                   | 0.94  |
| Maximum           |                  | 1373419                | 7810396                                      | 2.42E+07                                                          | 4.34E+08                                              | 3375.975                                    | 1313.323                                                      | 775.0912                                                       | 1.79E+07                                                                                  | 39.61 |
| Mean              |                  | 968998.9               | 4488244                                      | 1.24E+07                                                          | 1.41E+08                                              | 2338.639                                    | 701.6825                                                      | 351.0344                                                       | 7498041                                                                                   | 6.60  |
| Std Deviation     |                  | 193223.1               | 1023657                                      | 2998662                                                           | 6.43E+07                                              | 371.6365                                    | 177.0189                                                      | 94.29304                                                       | 2069772                                                                                   | 3.97  |
| Variance          |                  | 3.73E+10               | 1.05E+12                                     | 8.99E+12                                                          | 4.14E+15                                              | 138113.7                                    | 31335.68                                                      | 8891.177                                                       | 4.28E+12                                                                                  | 15.77 |
| Skewness          |                  | 5.58E-03               | 0.324216                                     | 0.4268551                                                         | 0.9042004                                             | 9.98E-02                                    | 0.3997979                                                     | 0.5182684                                                      | 0.541007                                                                                  | 2.00  |
| Kurtosis          |                  | 1.951589               | 2.621655                                     | 2.84445                                                           | 3.718847                                              | 2.487858                                    | 2.679513                                                      | 2.969911                                                       | 3.056195                                                                                  | 9.90  |
| Errors Calculated |                  | 0                      | 0                                            | 0                                                                 | 0                                                     | 0                                           | 0                                                             | 0                                                              | 0                                                                                         | 0.00  |
| Mode              |                  | 808721.4               | 2897077                                      | 1.05E+07                                                          | 1.07E+08                                              | 2296.027                                    | 672.2196                                                      | 390.3949                                                       | 4469240                                                                                   | 9.43  |
| 5% Perc           |                  | 665570.4               | 2948300                                      | 7966892                                                           | 5.75E+07                                              | 1736.157                                    | 438.7031                                                      | 215.0482                                                       | 4521195                                                                                   | 2.38  |
| 10% Perc          |                  | 710942.2               | 3163531                                      | 8674265                                                           | 6.88E+07                                              | 1844.549                                    | 484.6875                                                      | 237.4934                                                       | 5024296                                                                                   | 2.85  |
| 15% Perc          |                  | 743422                 | 3349362                                      | 9226491                                                           | 7.73E+07                                              | 1929.02                                     | 514.2192                                                      | 253.4315                                                       | 5346509                                                                                   | 3.23  |
| 20% Perc          |                  | 775447.6               | 3512419                                      | 9700344                                                           | 8.57E+07                                              | 2006.635                                    | 542.864                                                       | 266.1818                                                       | 5652203                                                                                   | 3.58  |
| 25% Perc          |                  | 806692.5               | 3683422                                      | 1.01E+07                                                          | 9.32E+07                                              | 2071.91                                     | 566.9645                                                      | 279.6006                                                       | 5955714                                                                                   | 3.89  |
| 30% Perc          |                  | 840905.3               | 3824645                                      | 1.05E+07                                                          | 9.99E+07                                              | 2129.468                                    | 589.7426                                                      | 292.6163                                                       | 6231631                                                                                   | 4.22  |
| 35% Perc          |                  | 871552.1               | 3994030                                      | 1.10E+07                                                          | 1.07E+08                                              | 2186.822                                    | 614.5435                                                      | 305.0667                                                       | 6501542                                                                                   | 4.54  |
| 40% Perc          |                  | 901858.8               | 4156781                                      | 1.14E+07                                                          | 1.13E+08                                              | 2232.868                                    | 637.5455                                                      | 317.0394                                                       | 6720775                                                                                   | 4.87  |
| 45% Perc          |                  | 935263.4               | 4312683                                      | 1.18E+07                                                          | 1.21E+08                                              | 2282.624                                    | 660.1616                                                      | 329.0659                                                       | 6969104                                                                                   | 5.22  |
| 50% Perc          |                  | 968159.1               | 4466537                                      | 1.22E+07                                                          | 1.29E+08                                              | 2329.004                                    | 684.848                                                       | 340.7986                                                       | 7236005                                                                                   | 5.57  |
| 55% Perc          |                  | 1001297                | 4599573                                      | 1.26E+07                                                          | 1.37E+08                                              | 2377.275                                    | 710.1323                                                      | 353.1037                                                       | 7537447                                                                                   | 5.95  |
| 60% Perc          |                  | 1033925                | 4742304                                      | 1.31E+07                                                          | 1.45E+08                                              | 2427.86                                     | 734.6134                                                      | 366.7282                                                       | 7815832                                                                                   | 6.35  |
| 65% Perc          |                  | 1066147                | 4888520                                      | 1.35E+07                                                          | 1.55E+08                                              | 2480.15                                     | 762.6612                                                      | 380.0676                                                       | 8101646                                                                                   | 6.89  |
| 70% Perc          |                  | 1099047                | 5029737                                      | 1.39E+07                                                          | 1.66E+08                                              | 2535.628                                    | 791.5603                                                      | 394.1062                                                       | 8453988                                                                                   | 7.52  |
| 75% Perc          |                  | 1128999                | 5193982                                      | 1.44E+07                                                          | 1.78E+08                                              | 2594.936                                    | 821.2644                                                      | 411.5185                                                       | 8841583                                                                                   | 8.21  |
| 80% Perc          |                  | 1162024                | 5362027                                      | 1.50E+07                                                          | 1.93E+08                                              | 2669.624                                    | 854.5231                                                      | 431.6886                                                       | 9292798                                                                                   | 9.02  |
| 85% Perc          |                  | 1194410                | 5563039                                      | 1.56E+07                                                          | 2.09E+08                                              | 2743.086                                    | 896.6968                                                      | 453.1962                                                       | 9765774                                                                                   | 10.05 |
| 90% Perc          |                  | 1229161                | 5854582                                      | 1.64E+07                                                          | 2.30E+08                                              | 2843.802                                    | 949.0186                                                      | 483.9087                                                       | 1.03E+07                                                                                  | 11.68 |
| 95% Perc          |                  | 1271645                | 6274716                                      | 1.78E+07                                                          | 2.66E+08                                              | 2965.49                                     | 1017.577                                                      | 521.6423                                                       | 1.13E+07                                                                                  | 14.20 |

\*) 50% of age group 5

## Gulf of Finland

| Name              | Perch catch (kg) |           | Perch catch in numbers | Perch stock in numbers, Perch age groups 2–5*) |           | Food consumption of<br>in numbers, fishing-<br>targeted subpopulation | Consumption of perch<br>(tonnes) by cormorants | Consumption of perch<br>(tonnes), fishing-<br>targeted subpopulation | Consumption of fishing-<br>targeted perch<br>subpopulation in<br>numbers | Proportion consumed<br>by cormorants of perch<br>age groups 2–5, fishing-<br>targeted subpopulation |
|-------------------|------------------|-----------|------------------------|------------------------------------------------|-----------|-----------------------------------------------------------------------|------------------------------------------------|----------------------------------------------------------------------|--------------------------------------------------------------------------|-----------------------------------------------------------------------------------------------------|
| Cell              | H4               | H9        | H10                    | H14                                            | H19       | H22                                                                   | H25                                            | H28                                                                  | H30                                                                      |                                                                                                     |
| Minimum           |                  | 223880.2  | 906393.7               | 2256356                                        | 1.02E+07  | 1218.319                                                              | 265.9306                                       | 122.0431                                                             | 2467976                                                                  | 1.40                                                                                                |
| Maximum           |                  | 726225.4  | 4320468                | 1.30E+07                                       | 2.20E+08  | 2768.304                                                              | 1070.865                                       | 577.1351                                                             | 1.32E+07                                                                 | 80.60                                                                                               |
| Mean              |                  | 477000.3  | 2208916                | 6123944                                        | 6.94E+07  | 1949.531                                                              | 584.7301                                       | 292.4278                                                             | 6243910                                                                  | 11.55                                                                                               |
| Std Deviation     |                  | 125294    | 629598.3               | 1824752                                        | 3.42E+07  | 305.3501                                                              | 145.6863                                       | 77.25731                                                             | 1690702                                                                  | 7.42                                                                                                |
| Variance          |                  | 1.57E+10  | 3.96E+11               | 3.33E+12                                       | 1.17E+15  | 93238.66                                                              | 21224.5                                        | 5968.692                                                             | 2.86E+12                                                                 | 54.99                                                                                               |
| Skewness          |                  | -4.69E-03 | 0.2573333              | 0.3481825                                      | 0.9972262 | 6.80E-02                                                              | 0.3748805                                      | 0.4768153                                                            | 0.5207108                                                                | 2.26                                                                                                |
| Kurtosis          |                  | 1.884877  | 2.40463                | 2.560431                                       | 3.958922  | 2.408323                                                              | 2.652841                                       | 2.851953                                                             | 2.981943                                                                 | 11.93                                                                                               |
| Errors Calculated |                  | 0         | 0                      | 0                                              | 0         | 0                                                                     | 0                                              | 0                                                                    | 0                                                                        | 0.00                                                                                                |
| Mode              |                  | 314133.3  | 1547510                | 4848120                                        | 4.15E+07  | 1913.845                                                              | 470.5909                                       | 266.0703                                                             | 4669829                                                                  | 8.62                                                                                                |
| 5% Perc           |                  | 282170.8  | 1255422                | 3416793                                        | 2.61E+07  | 1451.514                                                              | 367.03                                         | 180.551                                                              | 3819108                                                                  | 3.91                                                                                                |
| 10% Perc          |                  | 308260.4  | 1393105                | 3768090                                        | 3.17E+07  | 1542.204                                                              | 403.6559                                       | 198.2867                                                             | 4201210                                                                  | 4.77                                                                                                |
| 15% Perc          |                  | 327127.2  | 1501997                | 4104590                                        | 3.63E+07  | 1615.174                                                              | 430.3159                                       | 212.6753                                                             | 4503953                                                                  | 5.39                                                                                                |
| 20% Perc          |                  | 349075.6  | 1595031                | 4395600                                        | 4.04E+07  | 1677.567                                                              | 455.46                                         | 223.9829                                                             | 4766704                                                                  | 6.03                                                                                                |
| 25% Perc          |                  | 369614.6  | 1702654                | 4667155                                        | 4.38E+07  | 1730.571                                                              | 474.0729                                       | 234.8931                                                             | 4973120                                                                  | 6.59                                                                                                |
| 30% Perc          |                  | 391891    | 1792094                | 4938616                                        | 4.73E+07  | 1778.053                                                              | 493.6343                                       | 243.9183                                                             | 5169056                                                                  | 7.25                                                                                                |
| 35% Perc          |                  | 414797.1  | 1888900                | 5208307                                        | 5.10E+07  | 1823.89                                                               | 512.7587                                       | 253.616                                                              | 5399531                                                                  | 7.75                                                                                                |
| 40% Perc          |                  | 434186.8  | 1993839                | 5480258                                        | 5.46E+07  | 1864.667                                                              | 531.0031                                       | 263.3936                                                             | 5625377                                                                  | 8.34                                                                                                |
| 45% Perc          |                  | 455782    | 2088801                | 5748514                                        | 5.83E+07  | 1905.257                                                              | 550.3661                                       | 272.3962                                                             | 5826993                                                                  | 9.02                                                                                                |
| 50% Perc          |                  | 476880.8  | 2185920                | 6041501                                        | 6.21E+07  | 1937.803                                                              | 570.5281                                       | 283.5012                                                             | 6039287                                                                  | 9.65                                                                                                |
| 55% Perc          |                  | 497717.4  | 2285938                | 6292369                                        | 6.63E+07  | 1982.064                                                              | 591.1041                                       | 294.356                                                              | 6276972                                                                  | 10.36                                                                                               |
| 60% Perc          |                  | 519662.7  | 2378499                | 6553723                                        | 7.10E+07  | 2020.377                                                              | 614.3442                                       | 305.839                                                              | 6517263                                                                  | 11.03                                                                                               |
| 65% Perc          |                  | 541824.8  | 2471179                | 6799801                                        | 7.64E+07  | 2067.717                                                              | 638.3887                                       | 318.559                                                              | 6761729                                                                  | 11.99                                                                                               |
| 70% Perc          |                  | 562753.3  | 2571198                | 7098415                                        | 8.20E+07  | 2117.825                                                              | 661.9696                                       | 330.5467                                                             | 7046191                                                                  | 13.00                                                                                               |
| 75% Perc          |                  | 584161.3  | 2671731                | 7400814                                        | 8.83E+07  | 2164.331                                                              | 686.5279                                       | 342.2383                                                             | 7342409                                                                  | 14.24                                                                                               |
| 80% Perc          |                  | 604559.7  | 2779328                | 7766114                                        | 9.66E+07  | 2228.122                                                              | 713.0203                                       | 359.0155                                                             | 7684260                                                                  | 15.79                                                                                               |
| 85% Perc          |                  | 625203.4  | 2902369                | 8133737                                        | 1.05E+08  | 2293.656                                                              | 740.8715                                       | 377.0666                                                             | 8096196                                                                  | 17.73                                                                                               |
| 90% Perc          |                  | 649172.1  | 3052747                | 8621668                                        | 1.18E+08  | 2367.77                                                               | 780.7589                                       | 398.7415                                                             | 8580913                                                                  | 20.55                                                                                               |
| 95% Perc          |                  | 671691.5  | 3264563                | 9264460                                        | 1.34E+08  | 2464.26                                                               | 845.6652                                       | 431.3043                                                             | 9292782                                                                  | 25.40                                                                                               |

\*) 50% of age group 5

Rectangle 55H1 (Quark)

Number of cormorant nests in 2018: 3140

| Name                | Perch catch (kg),<br>recreational fishing | Total perch catch (kg),<br>commercial +<br>recreational | Perch catch in<br>numbers | Perch stock in<br>numbers, recruited to<br>fishery | Perch age groups 2–5<br>in numbers, fishing-<br>targeted<br>subpopulation | Food consumption of<br>cormorants (tonnes),<br>whole season | Consumption of perch<br>(tonnes) by<br>cormorants | Consumption of perch<br>(tonnes), fishing-<br>targeted<br>subpopulation | Consumption of perch<br>targeted perch<br>subpopulation in<br>numbers | Proportion consumed<br>by cormorants of<br>perch age groups 2–5,<br>fishing-targeted<br>subpopulation |
|---------------------|-------------------------------------------|---------------------------------------------------------|---------------------------|----------------------------------------------------|---------------------------------------------------------------------------|-------------------------------------------------------------|---------------------------------------------------|-------------------------------------------------------------------------|-----------------------------------------------------------------------|-------------------------------------------------------------------------------------------------------|
| Description<br>Cell | Output<br>H4                              | Output<br>H5                                            | Output<br>H9              | Output<br>H10                                      | Output<br>H14                                                             | Output<br>H19                                               | Output<br>H26                                     | Output<br>H29                                                           | Output<br>H32                                                         | Output<br>H34                                                                                         |
| Minimum             | 103734.2                                  | 207445.6                                                | 808596.9                  | 1467269                                            | 5649885                                                                   | 408.2265                                                    | 82.60748                                          | 37.1689                                                                 | 748409.9                                                              | 0.77                                                                                                  |
| Maximum             | 290397.8                                  | 453788.5                                                | 1964304                   | 5062840                                            | 1.32E+08                                                                  | 816.3641                                                    | 324.7321                                          | 181.1379                                                                | 4061520                                                               | 40.71                                                                                                 |
| Mean                | 185628.6                                  | 319128.6                                                | 1304558                   | 2778710                                            | 3.98E+07                                                                  | 612.3                                                       | 183.6351                                          | 91.80956                                                                | 1960465                                                               | 6.17                                                                                                  |
| Std Deviation       | 39271.82                                  | 52269.58                                                | 219462.8                  | 586676.2                                           | 1.82E+07                                                                  | 117.8432                                                    | 50.16731                                          | 26.19847                                                                | 572726.4                                                              | 3.88                                                                                                  |
| Variance            | 1.54E+09                                  | 2.73E+09                                                | 4.82E+10                  | 3.44E+11                                           | 3.33E+14                                                                  | 13887.02                                                    | 2516.759                                          | 686.36                                                                  | 3.28E+11                                                              | 15.06                                                                                                 |
| Skewness            | 0.2956189                                 | 0.2180075                                               | 0.2484968                 | 0.5476661                                          | 0.8483637                                                                 | -2.35E-06                                                   | 0.3829199                                         | 0.4493627                                                               | 0.5108796                                                             | 2.05                                                                                                  |
| Kurtosis            | 2.431584                                  | 2.370159                                                | 2.477804                  | 3.081117                                           | 3.708432                                                                  | 1.799997                                                    | 2.518646                                          | 2.680344                                                                | 2.855578                                                              | 9.78                                                                                                  |
| Errors Calculated   | 0                                         | 0                                                       | 0                         | 0                                                  | 0                                                                         | 0                                                           | 0                                                 | 0                                                                       | 0                                                                     | 0.00                                                                                                  |
| Mode                | 131762.3                                  | 305598.3                                                | 1083973                   | 2233073                                            | 3.50E+07                                                                  | 814.3585                                                    | 133.4508                                          | 59.36137                                                                | 1665567                                                               | 3.22                                                                                                  |
| 5% Perc             | 125200.3                                  | 236903.1                                                | 961936.1                  | 1933955                                            | 1.55E+07                                                                  | 428.5903                                                    | 108.6054                                          | 53.19059                                                                | 1128110                                                               | 2.16                                                                                                  |
| 10% Perc            | 135597.6                                  | 251803.6                                                | 1023192                   | 2064165                                            | 1.89E+07                                                                  | 449.0199                                                    | 120.8984                                          | 59.6332                                                                 | 1265888                                                               | 2.58                                                                                                  |
| 15% Perc            | 143487.7                                  | 262436.1                                                | 1068499                   | 2169216                                            | 2.16E+07                                                                  | 469.4118                                                    | 130.5372                                          | 64.41681                                                                | 1366922                                                               | 2.94                                                                                                  |
| 20% Perc            | 150320.6                                  | 271674.9                                                | 1105673                   | 2259643                                            | 2.40E+07                                                                  | 489.8111                                                    | 139.0159                                          | 68.59496                                                                | 1453921                                                               | 3.25                                                                                                  |
| 25% Perc            | 156407.9                                  | 279751.4                                                | 1137826                   | 2345985                                            | 2.61E+07                                                                  | 510.2409                                                    | 146.7734                                          | 72.27994                                                                | 1535108                                                               | 3.54                                                                                                  |
| 30% Perc            | 161936.5                                  | 287107.7                                                | 1171514                   | 2424125                                            | 2.81E+07                                                                  | 530.6198                                                    | 152.5851                                          | 75.58512                                                                | 1607930                                                               | 3.84                                                                                                  |
| 35% Perc            | 166957                                    | 294378.4                                                | 1203005                   | 2499346                                            | 3.01E+07                                                                  | 551.0569                                                    | 159.0937                                          | 79.08266                                                                | 1679072                                                               | 4.15                                                                                                  |
| 40% Perc            | 171964.1                                  | 301039.2                                                | 1230676                   | 2568857                                            | 3.23E+07                                                                  | 571.4656                                                    | 165.1645                                          | 82.0577                                                                 | 1751262                                                               | 4.48                                                                                                  |
| 45% Perc            | 176915.6                                  | 308551.2                                                | 1263102                   | 2643492                                            | 3.45E+07                                                                  | 591.8657                                                    | 171.1935                                          | 85.40427                                                                | 1816848                                                               | 4.80                                                                                                  |
| 50% Perc            | 182093.4                                  | 316300.8                                                | 1292065                   | 2720718                                            | 3.67E+07                                                                  | 612.2972                                                    | 177.8921                                          | 88.9269                                                                 | 1888438                                                               | 5.15                                                                                                  |
| 55% Perc            | 187238.5                                  | 323542.6                                                | 1320986                   | 2796867                                            | 3.91E+07                                                                  | 632.7083                                                    | 184.744                                           | 92.28304                                                                | 1965127                                                               | 5.53                                                                                                  |
| 60% Perc            | 192811.9                                  | 330513.7                                                | 1352533                   | 2873250                                            | 4.15E+07                                                                  | 653.088                                                     | 192.3716                                          | 95.87687                                                                | 2045305                                                               | 5.96                                                                                                  |
| 65% Perc            | 199195.2                                  | 338490.8                                                | 1384693                   | 2949384                                            | 4.43E+07                                                                  | 673.5059                                                    | 200.0033                                          | 100.0092                                                                | 2133043                                                               | 6.45                                                                                                  |
| 70% Perc            | 205785.4                                  | 346904.6                                                | 1419747                   | 3046626                                            | 4.74E+07                                                                  | 693.9123                                                    | 208.436                                           | 104.1673                                                                | 2228960                                                               | 7.01                                                                                                  |
| 75% Perc            | 212943.3                                  | 356102.5                                                | 1457257                   | 3152219                                            | 5.06E+07                                                                  | 714.3409                                                    | 217.571                                           | 109.1701                                                                | 2330521                                                               | 7.63                                                                                                  |
| 80% Perc            | 221130                                    | 366513.9                                                | 1499261                   | 3257474                                            | 5.46E+07                                                                  | 734.7537                                                    | 228.5716                                          | 114.6876                                                                | 2446710                                                               | 8.40                                                                                                  |
| 85% Perc            | 230028.5                                  | 378668.7                                                | 1547936                   | 3393082                                            | 5.93E+07                                                                  | 755.1572                                                    | 241.3026                                          | 120.8163                                                                | 2590227                                                               | 9.45                                                                                                  |
| 90% Perc            | 241800.1                                  | 392392.8                                                | 1608728                   | 3574646                                            | 6.48E+07                                                                  | 775.5601                                                    | 255.3431                                          | 128.8139                                                                | 2763212                                                               | 10.98                                                                                                 |
| 95% Perc            | 256215.6                                  | 411288.7                                                | 1691564                   | 3865574                                            | 7.41E+07                                                                  | 795.9865                                                    | 275.0042                                          | 140.4028                                                                | 3015863                                                               | 13.62                                                                                                 |
