# Supplementary material for: Cormorant predation mortality of perch (Perca fluviatilis) in coastal and archipelago areas, northern Baltic Sea
Source: Oxford University Press journal article supplement (doi:10.1093/icesjms/fsab258), 2021-12-13
Supplement: fsab258_supplemental_files.zip [file fsab258_supplemental_files.zip › Supplement_material_1_Data.xlsx]

## Sheet: Catch statistics
	Commercial perch catches in the Finnish sea area 2000 - 2019 (tonnes)
			Year
	Area		2000	2001	2002	2003	2004	2005	2006	2007	2008	2009	2010	2011	2012	2013	2014	2015	2016	2017	2018	2019
	Bothnian Bay		55	46	53	69	56	56	59	56	70	55	53	71	87	82	83	75	66	69	78	74
	Quark		82	52	72	94	76	89	94	123	115	119	113	138	149	147	179	159	157	149	126	131
	Bothnian Sea		112	122	206	231	175	173	205	186	181	143	178	210	183	184	203	124	127	97	95	81
	Archipelago Sea		372	427	384	413	312	381	335	321	293	180	228	263	358	226	385	216	238	154	210	295
	Gulf of Finland		86	82	71	67	53	58	59	38	37	40	59	99	86	50	62	35	23	18	20	25
	Åland		68	64	89	101	80	97	143	144	124	90	108	150	156	135	146	112	91	82	87	111
	Note: ICES rectangle 50H1 is included in the Archipelago Sea, not Bothnian Sea.
	Recreational perch catches in the Finnish sea area 2000 - 2018 (tonnes)
						Year
	Area					2000	2002	2004	2006	2008	2010	2012	2014	2016	2018
	Bothnian Bay					247	170	212	224	385	153	123	127	194	374
	Bothnian Sea and Quark					602	454	484	947	934	843	486	420	997	347
	Archipelago Sea and Åland*)					1029	1554	1139	1331	575	269	574	662	480	496
	Gulf of Finland					1114	529	721	858	632	617	368	577	524	205
	*)Proportion of Åland, average 16% (2006 - 2018)					16	16	16	18.1067	13.913	21.9331	16.0279	5.13595	13.75	24.5968
	Åland					164.64	248.64	182.24	241	80	59	92	34	66	122
	Archipelago Sea without Åland					864.36	1305.36	956.76	1090	495	210	482	628	414	374
	Source:
	Commercial catch statistics
	https://statdb.luke.fi/PXWeb/pxweb/en/LUKE/LUKE__06%20Kala%20ja%20riista__02%20Rakenne%20ja%20tuotanto__02%20Kaupallinen%20kalastus%20merella/4a_meri_saalis_ruutu.px/table/tableViewLayout2/
	Recreational catch statistics
	http://statdb.luke.fi/PXWeb/pxweb/en/LUKE/LUKE__06%20Kala%20ja%20riista__02%20Rakenne%20ja%20tuotanto__06%20Vapaa-ajankalastus/3_Vapaa-ajankalastuksen_saalis_alue.px/table/tableViewLayout2/

## Sheet: Cormorant nests
Numbers of cormorant nests in the Finnish sea area in 1996 - 2020						Source: Finnish Environment Institute, P. Rusanen
	Year
Area	1996	1997	1998	1999	2000	2001	2002	2003	2004	2005	2006	2007	2008	2009	2010	2011	2012	2013	2014	2015	2016	2017	2018	2019	2020
Bothnian Bay	0	0	0	0	31	25	42	43	133	111	143	197	219	254	203	162	178	193	206	315	504	624	1085	803	1362
Quark	0	0	0	0	0	10	9	21	108	114	150	205	547	720	719	1087	1096	1358	1771	2276	5963	3888	5340	3799	3191
Bothnian Sea	0	0	0	0	0	0	20	75	311	1047	1534	2296	3650	5654	5186	6297	6151	5840	5508	7560	5146	7125	5505	6542	7660
Archipelago Sea	0	0	3	0	1	9	163	210	581	1158	1611	3197	4439	4703	3586	4295	3888	4398	4850	5419	5271	5793	5786	5849	5012
Gulf of Finland	10	24	119	161	304	655	1156	1277	1777	2191	2332	3054	3822	4681	4725	5877	5945	6873	7911	8470	8666	8572	8988	8742	8536
Total	10	24	122	161	336	699	1390	1626	2910	4621	5770	8949	12677	16012	14419	17718	17258	18662	20246	24040	25550	26002	26704	25735	25761

## Sheet: VPA pop. size estimates
	Perch population size estimates (fishing-targeted stock) in numbers of individuals, Archipelago Sea (rectangles 49H1, 49H2, 50H1)
	Updated from Kokkonen et al. (2019) and Olin et al. (2020), with different natural mortality options.
	Low natural mortality (M)
	Year
Age	2008	2009	2010	2011	2012	2013	2014	2015	2016
2	1.31227e+07	1.44181e+07	1.43022e+07	1.10576e+07	1.08583e+07	7.79074e+06	1.2466e+07	2.47266e+07	7.48603e+06
3	9.49139e+06	9.72154e+06	1.06801e+07	1.05608e+07	8.09e+06	8.04249e+06	5.77023e+06	9.21751e+06	1.82909e+07
4	3.99525e+06	6.96899e+06	7.09495e+06	7.72238e+06	7.46418e+06	5.91906e+06	5.8689e+06	4.11293e+06	6.75279e+06
5	2.92745e+06	2.51521e+06	4.04111e+06	4.38826e+06	4.75125e+06	4.86221e+06	3.90464e+06	3.87349e+06	2.73173e+06
6	3.15475e+06	1.35998e+06	1.09956e+06	2.14104e+06	2.53424e+06	2.8923e+06	2.97351e+06	2.00397e+06	2.20215e+06
7	1.48692e+06	1.29359e+06	499311	719323	1.24072e+06	1.28236e+06	1.79785e+06	939727	780544
8	443693	518686	329619	254350	514058	501896	735362	314953	210668
9	467428	269029	218614	117376	169329	272981	262877	56126.6	65613.4
10	75952.2	137703	94555.2	87985.9	59809.4	93232	196112	32227.4	13009.5
11	97421	35026.1	16627.7	37465.4	67115.9	45306.2	61526.4	14514.8	0
12	37643.5	18401.8	24740.2	3187.24	28132.2	40029.6	31474.5	5218.6	3689.55
13	15359.5	9770.09	7243.67	14041	0	11548.7	27629.6	5218.6	0
14	8237.78	9194.31	1887.56	5700.37	1876.85	0	0	1739.53	0
15	0	7453.85	2593.67	0	5157.91	0	0	0	0
	Medium natural mortality (M)
	Year
Age	2008	2009	2010	2011	2012	2013	2014	2015	2016
2	3.65197e+07	4.01535e+07	3.89713e+07	3.03033e+07	2.99306e+07	2.14093e+07	3.45956e+07	6.57346e+07	1.9642e+07
3	1.92111e+07	2.00424e+07	2.20357e+07	2.13582e+07	1.65433e+07	1.64249e+07	1.17486e+07	1.89713e+07	3.60526e+07
4	6.09391e+06	1.04895e+07	1.09075e+07	1.19303e+07	1.14122e+07	9.01531e+06	8.93749e+06	6.30853e+06	1.03465e+07
5	3.36854e+06	2.96179e+06	4.79137e+06	5.23921e+06	5.71291e+06	5.68874e+06	4.5343e+06	4.49676e+06	3.1909e+06
6	3.49855e+06	1.50922e+06	1.28123e+06	2.43894e+06	2.87437e+06	3.28319e+06	3.25612e+06	2.22439e+06	2.40936e+06
7	1.59405e+06	1.37955e+06	540062	786825	1.33424e+06	1.39191e+06	1.90879e+06	1.00046e+06	838823
8	443693	518686	329619	254350	514058	501896	735362	314953	210668
9	467428	269029	218614	117376	169329	272981	262877	56126.6	65613.4
10	75952.2	137703	94555.2	87985.9	59809.4	93232	196112	32227.4	13009.5
11	97421	35026.1	16627.7	37465.4	67115.9	45306.2	61526.4	14514.8	0
12	37643.5	18401.8	24740.2	3187.24	28132.2	40029.6	31474.5	5218.6	3689.55
13	15359.5	9770.09	7243.67	14041	0	11548.7	27629.6	5218.6	0
14	8237.78	9194.31	1887.56	5700.37	1876.85	0	0	1739.53	0
15	0	7453.85	2593.67	0	5157.91	0	0	0	0
	High natural mortality (M)
	Year
Age	2008	2009	2010	2011	2012	2013	2014	2015	2016
2	9.51122e+07	1.04459e+08	1.01543e+08	7.91487e+07	7.86456e+07	5.56686e+07	8.9928e+07	1.68621e+08	4.99752e+07
3	3.66863e+07	3.86697e+07	4.24692e+07	4.12585e+07	3.21041e+07	3.19738e+07	2.26322e+07	3.6549e+07	6.85361e+07
4	8.69762e+06	1.48693e+07	1.56427e+07	1.71262e+07	1.65082e+07	1.29976e+07	1.29335e+07	9.08173e+06	1.48036e+07
5	3.65105e+06	3.20686e+06	5.21448e+06	5.71697e+06	6.24469e+06	6.21731e+06	4.92862e+06	4.90701e+06	3.45885e+06
6	3.49855e+06	1.50922e+06	1.28123e+06	2.43894e+06	2.87437e+06	3.28319e+06	3.25612e+06	2.22439e+06	2.4123e+06
7	1.59405e+06	1.37955e+06	540062	786825	1.33424e+06	1.39191e+06	1.90879e+06	1.00046e+06	838823
8	443693	518686	329619	254350	514058	501896	735362	314953	210668
9	467428	269029	218614	117376	169329	272981	262877	56126.6	65613.4
10	75952.2	137703	94555.2	87985.9	59809.4	93232	196112	32227.4	13009.5
11	97421	35026.1	16627.7	37465.4	67115.9	45306.2	61526.4	14514.8	0
12	37643.5	18401.8	24740.2	3187.24	28132.2	40029.6	31474.5	5218.6	3689.55
13	15359.5	9770.09	7243.67	14041	0	11548.7	27629.6	5218.6	0
14	8237.78	9194.31	1887.56	5700.37	1876.85	0	0	1739.53	0
15	0	7453.85	2593.67	0	5157.91	0	0	0	0

## Sheet: Experimental perch catches
Perch catches (number of individuals) per unit of effort (one gillnet, one night) in the experimental gillnet fishing, Brunskär, Korppoo, Archipelago Sea
			Length group (cm)
Area	Year	Number of gillnets	5	6	7	8	9	10	11	12	13	14	15	16	17	18	19	20	21	22	23	24	25	26	27	28	29	30	31
Brunskär	2002	30					0.37	1.4	2.6	2.2	0.4	2	3.07	3.57	3.2	4.43	3.6	3.4	3.3	2.73	2.6	2.23	1.43	1.1	1.03	0.63	0.27	0.07
Brunskär	2003	29				0.24	0.72	1.79	2.79	2.93	2.38	4.17	4.97	5.41	5.07	5.14	4.59	3.83	3.97	4.14	3.45	2.48	1.83	1.9	1.38	1.1	0.28	0.14	0.07
Brunskär	2004	30			0.27	1	0.4	0.37	0.27	1.2	2.1	4.13	2.53	2.1	2.47	2.7	2.3	1.73	2.63	2.4	1.73	1.93	1.37	1.83	1.17	0.6	0.2		0.03
Brunskär	2005	39					0.03	0.15	0.23	2.46	3.77	4.49	2.82	1.87	3.31	3.9	3	2.59	2.54	2.92	2.54	1.97	1.87	1.79	0.92	0.54	0.15
Brunskär	2006	39				1.49	2.59	2.31	0.59	1.62	1.9	2.79	3.03	2.97	3.82	4.87	4.51	3.62	4	3.03	3.18	2.23	1.74	1.28	0.79	0.41	0.05	0.03	0.03
Brunskär	2007	39				1.44	4.72	4.38	1.62	0.95	2.03	6.21	7.49	4.33	3.77	3.82	4.18	3.1	2.74	3.08	2.05	1.1	0.77	0.56	0.56	0.08	0.03
Brunskär	2008	39			0.08	1.97	5.54	3.92	0.85	2.51	5.21	9.46	5.87	3.31	3.59	5.13	4.67	3.18	2.26	1.82	0.79	0.54	0.36	0.33	0.15				0.03
Brunskär	2009	39				0.46	2.56	3.08	1.44	1.67	5	8.1	6.41	3.49	4.69	6.1	4.62	3.23	2.56	1.31	0.69	0.46	0.28	0.21	0.13		0.03
Brunskär	2010	39					0.67	1.1	0.72	1.31	2.64	6.05	6.56	3.82	3.62	4.26	2.92	2.18	1.56	0.92	0.54	0.31	0.26	0.13	0.03		0.03
Brunskär	2011	39				0.03	0.51	5.13	15.28	9.72	5.56	2.72	1.1	2.23	3.54	4.46	4.95	3.82	3.36	2.62	2.31	1.03	0.62	0.31	0.21	0.08	0.03
Brunskär	2012	39				0.03	0.69	1.15	1.28	1.51	3.1	7	9.31	9.21	8.54	5.59	3.13	1.79	1.95	1.59	0.9	0.51	0.59	0.26	0.08	0.05
Brunskär	2013	39			0.03	2.59	8.38	5.72	0.92	1.59	2.77	4.77	4.72	3.77	4.59	6.54	4.92	2.69	2.31	1.33	0.62	0.31	0.15	0.13	0.08	0.1	0.05
Brunskär	2014	39				0.13	15.13	27.72	18.51	5.79	1.56	4.64	3.82	2.03	3.23	5.31	3.95	3.97	2.44	1.77	1.49	0.54	0.28	0.13	0.08		0.05
Brunskär	2015	39					0.21	0.64	0.38	2	5.1	7.59	7.33	5.03	3.26	2.9	2.23	1.23	1.05	0.74	0.49	0.33	0.1	0.05	0.03	0.03
Brunskär	2016	39				0.08	7.54	13.87	4.15	1.95	1.1	2.33	4.31	4.67	4.28	5.92	5.72	3.41	2.54	1.56	1.15	0.51	0.21	0.28	0.21	0.03	0.03
Brunskär	2017	39			1.08	11.56	10.08	2.46	1.1	0.87	2.08	4.08	3.72	2.28	1.85	2.92	2.59	2.03	1.74	1.56	0.64	0.69	0.18	0.21	0.08
Brunskär	2018	39					0.15	0.23	6.08	22.33	15.74	14.38	10.13	4.41	3.79	4.03	2.62	1.92	1.82	1.13	0.51	0.38	0.23	0.21	0.18	0.08
Brunskär	2019	39	0.18	0.05	0.13	0.05	0.1	1.54	8.23	8.08	3.44	4.21	6.31	7.97	8.9	10.05	6.31	3.41	2.36	1.36	0.36	0.13	0.13	0.08	0.08
Brunskär	2020	39			0.03	0.05	2.05	7.23	7.13	3.18	0.9	1.46	3.46	4.46	6.97	6.62	3.59	2.1	1.87	1.23	0.69	0.44	0.15	0.15	0.05
Perch catches (number of individuals) per unit of effort (one gillnet, one night) in the experimental gillnet fishing, Tvärminne, Hanko, Gulf of Finland
			Length group (cm)
Area	Year	Number of gillnets	4	5	6	7	8	9	10	11	12	13	14	15	16	17	18	19	20	21	22	23	24	25	26	27	28	29	30	31	32	33	34	35	36	37	38	39	40
Tvärminne	2005	30					0.03	0.13	0.47	0.37	0.83	1.5	2.47	2.53	0.87	0.83	0.97	0.73	0.6	0.53	0.53	0.67	0.67	0.53	0.47	0.53	0.4	0.17	0.13	0.03	0.07				0.03
Tvärminne	2006	30	0.03			0.03		2.57	5.13	3.9	0.87	0.43	1.07	1.8	0.8	1.07	0.77	0.83	0.37	0.43	0.33	0.4	0.4	0.27	0.17	0.5	0.33	0.2	0.13	0.03			0.07	0.03	0.03			0.03	0.07
Tvärminne	2007	30					0.03	1.43	8.87	8.87	3.83	1.27	2.53	2	0.77	0.8	1.07	1.1	1.03	1.4	1.33	1.53	0.97	0.9	1.1	0.73	0.43	0.3	0.1	0.1	0.03			0.03
Tvärminne	2008	30						0.5	2.4	2.33	1.63	1.73	3.63	2.63	1.23	1.33	1.73	1.83	1.03	1.1	0.87	0.6	0.47	0.43	0.43	0.3	0.13	0.23	0.07		0.03	0.03		0.03	0.03
Tvärminne	2009	30						0.1	1.03	1.97	2.1	2.27	5.17	5.03	3.3	3.3	5.23	4.53	2.77	1.83	2.2	1.33	0.5	0.37	0.53	0.3	0.3	0.17	0.07	0.03		0.03							0.03
Tvärminne	2010	30				2	5.07	0.5	0.2	1.4	4.6	3.67	3.4	3.1	1.67	2.5	4.13	2.83	2.5	2.77	2.53	1.6	1.6	1.43	0.97	0.63	0.33	0.03	0.07	0.07
Tvärminne	2011	30				0.03	0.3	0.1	0.6	3.57	7.73	4.37	3.2	1.1	0.9	1.57	2.5	2.5	2.5	2.83	2.9	2.4	1.83	1.4	1.63	1.13	0.53	0.43	0.3	0.03
Tvärminne	2012	30					0.03	1.57	4.77	2.23	0.8	0.83	2.17	2.53	0.63	0.5	0.7	0.73	0.7	0.73	1	1	0.8	0.63	0.67	0.57	0.27	0.1	0.07		0.07
Tvärminne	2013	30						0.23	1.1	1.03	4.1	2.9	1.83	1.5	1.07	0.77	1.63	1.23	1.17	0.73	0.73	0.73	0.47	0.4	0.33	0.23	0.1	0.03
Tvärminne	2014	30				0.13	1.13	0.1	0.03	1.23	6.5	4.93	6.43	6.63	5.43	4.7	4.37	2.63	1.5	1.23	1.03	0.33	0.4	0.23	0.3	0.17	0.17	0.07
Tvärminne	2015	30						0.2	0.87	1.83	2.07	0.4	0.47	1	0.83	1.07	0.63	1.13	0.83	0.6	0.87	0.37	0.33	0.43	0.33	0.33	0.3	0.1		0.07
Tvärminne	2016	30						0.27	1.33	1.3	1.43	1.8	1.87	2.3	1.03	0.73	1.07	1.2	0.9	0.47	0.53	0.4	0.4	0.17	0.07	0.03	0.03
Tvärminne	2017	30					0.5	4.4	4.03	1.37	1.4	1.17	1.97	1.43	1.1	1.07	1.53	1.3	0.77	0.7	0.8	0.33	0.27	0.4	0.07	0.07		0.07	0.03
Tvärminne	2018	30				1.93	9.94	2.09	0.78	3.87	7.1	3.33	5.57	5.8	3.4	2.83	2.2	1.3	0.87	0.73	0.47	0.33	0.3	0.2	0.1		0.07	0.03
Tvärminne	2019	30				0.07		0.1	0.97	4.7	6.1	2.3	1.87	1.3	0.77	0.67	1.03	1.17	0.57	0.37	0.37	0.33	0.17	0.03	0.07
Tvärminne	2020	30				0.03	0.33		0.1	1.83	6.07	4.27	3.77	5.07	6.43	7.1	6.33	4.17	3.17	2.7	1.9	1.5	0.73	0.7	0.4	0.23	0.1
Source: Koekalastusrekisteri, Coastal-verkot. Experimental gillnet fishing register, Standardized Coastal Nordic survey gillnets. Finnish Environment Institute (SYKE). https://wwwp2.ymparisto.fi/koekalastus_coastal/Default.aspx. Last accessed 01 July 2021.
